# Supplementary material for: Neutral Sphingomyelinase 2 Heightens Anti-Melanoma Immune Responses and Anti–PD-1 Therapy Efficacy
Source: Oxford University Press journal article supplement (doi:10.1158/2326-6066.cir-20-0342), 2021-03-16
Supplement: 23266066cir200342-sup-242057_2_supp_6877751_qprwyf.xlsx [file 23266066cir200342-sup-242057_2_supp_6877751_qprwyf.xlsx]

## Sheet: Feuil1
_PATIENT	days_to_procurement	days_to_death	days_to_last_followup	vital_status	sample_type
TCGA-3N-A9WB	439	518	.	1	Metastatic
TCGA-3N-A9WC	1637	.	2022	0	Metastatic
TCGA-3N-A9WD	192	395	.	1	Metastatic
TCGA-BF-A1PU	-1	.	387	0	Primary
TCGA-BF-A1PV	1	.	14	0	Primary
TCGA-BF-A1PX	0	282	.	1	Primary
TCGA-BF-A1PZ	0	.	853	0	Primary
TCGA-BF-A1Q0	0	.	831	0	Primary
TCGA-BF-A3DJ	0	.	464	0	Primary
TCGA-BF-A3DL	-4	.	769	0	Primary
TCGA-BF-A3DM	-9	.	601	0	Primary
TCGA-BF-A3DN	-3	.	717	0	Primary
TCGA-D3-A1Q1	58	504	.	1	Metastatic
TCGA-D3-A1Q3	259	507	.	1	Metastatic
TCGA-D3-A1Q4	41	.	3408	0	Metastatic
TCGA-D3-A1Q5	2492	3424	.	1	Metastatic
TCGA-D3-A1Q6	50	2184	.	1	Metastatic
TCGA-D3-A1Q7	770	.	4053	0	Metastatic
TCGA-D3-A1Q8	27	854	.	1	Metastatic
TCGA-D3-A1Q9	310	961	.	1	Metastatic
TCGA-D3-A1QA	1624	.	2765	0	Metastatic
TCGA-D3-A1QB	456	.	2912	0	Metastatic
TCGA-D3-A2J6	1025	1321	.	1	Metastatic
TCGA-D3-A2J7	553	3136	.	1	Metastatic
TCGA-D3-A2J8	1753	1992	.	1	Metastatic
TCGA-D3-A2J9	87	723	.	1	Metastatic
TCGA-D3-A2JA	822	.	3514	0	Metastatic
TCGA-D3-A2JB	3065	5110	.	1	Metastatic
TCGA-D3-A2JC	13	.	2639	0	Metastatic
TCGA-D3-A2JD	18	361	.	1	Metastatic
TCGA-D3-A2JF	588	.	1888	0	Metastatic
TCGA-D3-A2JG	3246	3453	.	1	Metastatic
TCGA-D3-A2JH	197	.	1280	0	Metastatic
TCGA-D3-A2JK	176	368	.	1	Metastatic
TCGA-D3-A2JL	2514	.	5219	0	Metastatic
TCGA-D3-A2JN	34	2022	1709	1	Metastatic
TCGA-D3-A2JO	98	.	2010	0	Metastatic
TCGA-D3-A2JP	22	.	1812	0	Metastatic
TCGA-D3-A3BZ	512	.	3976	0	Metastatic
TCGA-D3-A3C6	1325	1766	.	1	Metastatic
TCGA-D3-A3C7	62	.	1429	0	Metastatic
TCGA-D3-A3C8	55	.	1409	0	Metastatic
TCGA-D3-A3CB	2590	.	5065	0	Metastatic
TCGA-D3-A3CC	777	.	2644	0	Metastatic
TCGA-D3-A3CE	1427	1832	.	1	Metastatic
TCGA-D3-A3CF	44	746	.	1	Metastatic
TCGA-D3-A3ML	239	422	.	1	Metastatic
TCGA-D3-A3MO	23	284	.	1	Metastatic
TCGA-D3-A3MR	55	.	3151	0	Metastatic
TCGA-D3-A3MU	427	.	1209	0	Metastatic
TCGA-D3-A3MV	530	.	1378	0	Metastatic
TCGA-D3-A51E	2506	.	5318	0	Metastatic
TCGA-D3-A51F	83	.	1695	0	Metastatic
TCGA-D3-A51H	853	.	1714	0	Metastatic
TCGA-D3-A51J	2792	.	4414	0	Metastatic
TCGA-D3-A51K	47	.	1002	0	Metastatic
TCGA-D3-A51N	95	.	688	0	Metastatic
TCGA-D3-A51R	961	.	1941	0	Metastatic
TCGA-D3-A51T	51	.	818	0	Metastatic
TCGA-D3-A5GL	496	.	3826	0	Metastatic
TCGA-D3-A5GN	2574	.	4129	0	Metastatic
TCGA-D3-A5GO	2788	.	4195	0	Metastatic
TCGA-D3-A5GR	5040	.	5424	0	Metastatic
TCGA-D3-A5GS	42	.	553	0	Metastatic
TCGA-D3-A5GT	35	.	487	0	Primary
TCGA-D3-A5GU	3125	.	3808	0	Metastatic
TCGA-D3-A8GB	43	938	.	1	Metastatic
TCGA-D3-A8GC	1791	2421	.	1	Metastatic
TCGA-D3-A8GD	53	.	718	0	Metastatic
TCGA-D3-A8GE	110	.	804	0	Metastatic
TCGA-D3-A8GI	1709	1780	.	1	Metastatic
TCGA-D3-A8GJ	2664	.	7342	0	Metastatic
TCGA-D3-A8GK	1896	.	5177	0	Metastatic
TCGA-D3-A8GL	1683	2711	.	1	Metastatic
TCGA-D3-A8GM	630	3259	2897	1	Metastatic
TCGA-D3-A8GN	1156	.	4897	0	Metastatic
TCGA-D3-A8GP	1571	.	4646	0	Metastatic
TCGA-D3-A8GQ	540	884	.	1	Metastatic
TCGA-D3-A8GR	3775	3943	.	1	Metastatic
TCGA-D3-A8GS	2834	3564	.	1	Metastatic
TCGA-D9-A148	4021	.	4609	0	Metastatic
TCGA-D9-A149	1075	.	1663	0	Metastatic
TCGA-D9-A1JW	69	.	111	0	Metastatic
TCGA-D9-A1JX	125	216	195	1	Metastatic
TCGA-D9-A1X3	0	.	551	0	Metastatic
TCGA-D9-A3Z1	223	468	345	1	Metastatic
TCGA-D9-A3Z3	11	.	678	0	Metastatic
TCGA-D9-A3Z4	0	519	119	1	Primary
TCGA-D9-A4Z2	0	190	93	1	Primary
TCGA-D9-A4Z3	8	.	505	0	Primary
TCGA-D9-A4Z5	0	.	218	0	Primary
TCGA-D9-A4Z6	220	561	338	1	Metastatic
TCGA-D9-A6E9	-25	.	301	0	Metastatic
TCGA-D9-A6EA	415	.	766	0	Metastatic
TCGA-D9-A6EC	1606	.	2359	0	Metastatic
TCGA-D9-A6EG	254	698	.	1	Metastatic
TCGA-DA-A1HV	0	.	2329	0	Metastatic
TCGA-DA-A1HW	7	1096	820	0	Metastatic
TCGA-DA-A1HY	2010	.	4407	0	Metastatic
TCGA-DA-A1I0	192	620	594	1	Metastatic
TCGA-DA-A1I1	4734	.	6311	0	Metastatic
TCGA-DA-A1I2	4679	5370	5088	1	Metastatic
TCGA-DA-A1I4	789	1093	823	1	Metastatic
TCGA-DA-A1I5	1912	.	3650	0	Metastatic
TCGA-DA-A1I7	745	.	2246	0	Metastatic
TCGA-DA-A1I8	875	1640	1368	1	Metastatic
TCGA-DA-A1IA	1855	2005	1887	1	Metastatic
TCGA-DA-A1IB	33	1235	825	0	Metastatic
TCGA-DA-A1IC	1869	2071	1926	1	Metastatic
TCGA-DA-A3F2	281	1032	1025	1	Metastatic
TCGA-DA-A3F3	106	319	151	1	Metastatic
TCGA-DA-A3F5	6019	6873	6826	1	Metastatic
TCGA-DA-A3F8	26	.	1319	0	Metastatic
TCGA-EB-A1NK	0	.	1039	0	Primary
TCGA-EB-A24C	0	.	632	0	Primary
TCGA-EB-A24D	32	.	645	0	Primary
TCGA-EB-A299	0	.	378	0	Primary
TCGA-EB-A3HV	0	.	39	0	Primary
TCGA-EB-A3XB	0	.	796	0	Primary
TCGA-EB-A3XC	0	.	650	0	Primary
TCGA-EB-A3XD	-5	.	1160	0	Primary
TCGA-EB-A3XE	-5	.	180	0	Primary
TCGA-EB-A3XF	-2	.	278	0	Primary
TCGA-EB-A3Y6	16	.	126	0	Primary
TCGA-EB-A3Y7	0	326	0	1	Primary
TCGA-EB-A41A	8	.	262	0	Primary
TCGA-EB-A41B	3	.	291	0	Primary
TCGA-EB-A42Y	2	721	440	1	Primary
TCGA-EB-A42Z	4	.	441	0	Primary
TCGA-EB-A430	-2	.	-2	0	Primary
TCGA-EB-A431	0	.	568	0	Primary
TCGA-EB-A44N	0	205	45	1	Primary
TCGA-EB-A44O	5	.	81	0	Primary
TCGA-EB-A44P	-6	.	741	0	Primary
TCGA-EB-A44Q	22	.	422	0	Metastatic
TCGA-EB-A44R	303	315	309	1	Metastatic
TCGA-EB-A4IQ	-2	636	414	1	Primary
TCGA-EB-A4IS	0	.	774	0	Primary
TCGA-EB-A4OY	-2	.	977	0	Primary
TCGA-EB-A4OZ	-3	.	620	0	Primary
TCGA-EB-A4P0	-2	326	-2	1	Primary
TCGA-EB-A4XL	0	.	777	0	Primary
TCGA-EB-A51B	-5	.	931	0	Primary
TCGA-EB-A550	-9	264	6	1	Primary
TCGA-EB-A551	8	.	590	0	Primary
TCGA-EB-A553	13	.	226	0	Primary
TCGA-EB-A57M	3	472	399	1	Primary
TCGA-EB-A5FP	6	454	6	1	Primary
TCGA-EB-A5KH	537	619	543	1	Metastatic
TCGA-EB-A5SE	0	401	0	1	Primary
TCGA-EB-A5SF	0	369	0	1	Primary
TCGA-EB-A5SG	1372	.	2076	0	Metastatic
TCGA-EB-A5SH	1065	.	1643	0	Metastatic
TCGA-EB-A5UL	108	.	891	0	Metastatic
TCGA-EB-A5UM	0	.	779	0	Primary
TCGA-EB-A5UN	1178	.	1792	0	Metastatic
TCGA-EB-A5VU	6	321	12	1	Primary
TCGA-EB-A5VV	193	.	214	0	Metastatic
TCGA-EB-A6L9	365	.	1109	0	Metastatic
TCGA-EB-A6QY	-5	.	382	0	Primary
TCGA-EB-A6QZ	-3	352	-3	1	Primary
TCGA-EB-A6R0	-2	608	467	1	Primary
TCGA-EB-A82B	8	.	390	0	Primary
TCGA-EB-A82C	11	.	17	0	Primary
TCGA-EB-A85I	-5	.	362	0	Primary
TCGA-EB-A85J	-6	.	360	0	Primary
TCGA-EB-A97M	11	.	414	0	Primary
TCGA-EE-A17X	587	907	.	1	Metastatic
TCGA-EE-A17Y	507	828	.	1	Metastatic
TCGA-EE-A17Z	74	263	.	1	Metastatic
TCGA-EE-A180	2642	2889	.	1	Metastatic
TCGA-EE-A181	992	1026	.	1	Metastatic
TCGA-EE-A182	406	447	.	1	Metastatic
TCGA-EE-A183	470	818	.	1	Metastatic
TCGA-EE-A184	1932	2073	.	1	Metastatic
TCGA-EE-A185	20	151	.	1	Metastatic
TCGA-EE-A20B	2239	.	4070	0	Metastatic
TCGA-EE-A20C	4469	4601	.	1	Metastatic
TCGA-EE-A20F	2335	.	2785	0	Metastatic
TCGA-EE-A20H	4851	5118	.	1	Metastatic
TCGA-EE-A20I	376	412	.	1	Metastatic
TCGA-EE-A29A	1684	1927	.	1	Metastatic
TCGA-EE-A29B	2195	2588	2452	1	Metastatic
TCGA-EE-A29C	308	2402	1455	1	Metastatic
TCGA-EE-A29D	86	425	.	1	Metastatic
TCGA-EE-A29E	63	.	1940	0	Metastatic
TCGA-EE-A29G	1932	2192	.	1	Metastatic
TCGA-EE-A29H	845	.	1966	0	Metastatic
TCGA-EE-A29L	46	79	.	1	Metastatic
TCGA-EE-A29M	545	.	1729	0	Metastatic
TCGA-EE-A29N	313	566	.	1	Metastatic
TCGA-EE-A29P	1429	.	1716	0	Metastatic
TCGA-EE-A29Q	906	2030	1136	1	Metastatic
TCGA-EE-A29R	203	.	440	0	Metastatic
TCGA-EE-A29S	1418	1864	1701	1	Metastatic
TCGA-EE-A29T	10326	.	11252	0	Metastatic
TCGA-EE-A29V	713	787	.	1	Metastatic
TCGA-EE-A29W	4976	.	5932	0	Metastatic
TCGA-EE-A29X	315	545	.	1	Metastatic
TCGA-EE-A2A0	1114	1424	.	1	Metastatic
TCGA-EE-A2A1	1646	.	3527	0	Metastatic
TCGA-EE-A2A2	45	.	1814	0	Metastatic
TCGA-EE-A2A5	909	1195	.	1	Metastatic
TCGA-EE-A2A6	1535	.	2620	0	Metastatic
TCGA-EE-A2GB	248	.	1803	0	Metastatic
TCGA-EE-A2GC	1056	.	2051	0	Metastatic
TCGA-EE-A2GD	9021	10346	9568	1	Metastatic
TCGA-EE-A2GE	3073	.	5286	0	Metastatic
TCGA-EE-A2GH	4898	.	6699	0	Metastatic
TCGA-EE-A2GI	579	.	1482	0	Metastatic
TCGA-EE-A2GJ	2147	3266	2717	1	Metastatic
TCGA-EE-A2GK	1231	.	1665	0	Metastatic
TCGA-EE-A2GL	1364	.	2423	0	Metastatic
TCGA-EE-A2GM	1435	.	2296	0	Metastatic
TCGA-EE-A2GN	1750	3106	2767	1	Metastatic
TCGA-EE-A2GO	2176	.	3857	0	Metastatic
TCGA-EE-A2GP	258	423	.	1	Metastatic
TCGA-EE-A2GR	419	1301	435	1	Metastatic
TCGA-EE-A2GS	1315	2470	1691	1	Metastatic
TCGA-EE-A2GT	315	.	1365	0	Metastatic
TCGA-EE-A2GU	1799	.	2884	0	Metastatic
TCGA-EE-A2M5	403	659	.	1	Metastatic
TCGA-EE-A2M6	963	.	3932	0	Metastatic
TCGA-EE-A2M7	807	877	.	1	Metastatic
TCGA-EE-A2M8	432	601	.	1	Metastatic
TCGA-EE-A2MC	426	1871	.	1	Metastatic
TCGA-EE-A2MD	1163	1438	.	1	Metastatic
TCGA-EE-A2ME	2245	3141	.	1	Metastatic
TCGA-EE-A2MF	8113	8174	.	1	Metastatic
TCGA-EE-A2MG	1813	3139	.	1	Metastatic
TCGA-EE-A2MH	301	516	.	1	Metastatic
TCGA-EE-A2MI	5795	6225	.	1	Metastatic
TCGA-EE-A2MJ	998	2927	.	1	Metastatic
TCGA-EE-A2MK	1046	.	5487	0	Metastatic
TCGA-EE-A2ML	2792	6590	6176	1	Metastatic
TCGA-EE-A2MM	3445	5107	.	1	Metastatic
TCGA-EE-A2MN	694	1446	.	1	Metastatic
TCGA-EE-A2MP	6748	.	7563	0	Metastatic
TCGA-EE-A2MQ	683	1315	.	1	Metastatic
TCGA-EE-A2MR	2265	.	4088	0	Metastatic
TCGA-EE-A2MS	3362	.	4942	0	Metastatic
TCGA-EE-A2MT	586	.	2166	0	Metastatic
TCGA-EE-A2MU	1486	.	1620	0	Metastatic
TCGA-EE-A3AA	29	.	3781	0	Metastatic
TCGA-EE-A3AB	29	.	3733	0	Metastatic
TCGA-EE-A3AC	24	.	1948	0	Metastatic
TCGA-EE-A3AD	15	875	112	1	Metastatic
TCGA-EE-A3AE	762	.	1658	0	Metastatic
TCGA-EE-A3AF	90	420	.	1	Metastatic
TCGA-EE-A3AG	229	1265	714	1	Metastatic
TCGA-EE-A3AH	3844	4222	.	1	Metastatic
TCGA-EE-A3J3	5139	5237	.	1	Metastatic
TCGA-EE-A3J4	3172	3869	.	1	Metastatic
TCGA-EE-A3J5	467	1124	.	1	Metastatic
TCGA-EE-A3J7	1292	.	1949	0	Metastatic
TCGA-EE-A3J8	553	1044	.	1	Metastatic
TCGA-EE-A3JA	942	1618	.	1	Metastatic
TCGA-EE-A3JB	6138	.	6138	0	Metastatic
TCGA-EE-A3JD	0	832	.	1	Metastatic
TCGA-EE-A3JE	1007	.	1562	0	Metastatic
TCGA-EE-A3JH	2672	.	4086	0	Metastatic
TCGA-EE-A3JI	3543	4648	4504	1	Metastatic
TCGA-ER-A193	0	955	.	1	Metastatic
TCGA-ER-A194	78	1354	.	1	Primary
TCGA-ER-A195	512	1078	.	1	Metastatic
TCGA-ER-A196	0	.	1785	0	Primary
TCGA-ER-A197	30	424	.	1	Metastatic
TCGA-ER-A198	376	1544	.	1	Metastatic
TCGA-ER-A199	105	279	.	1	Metastatic
TCGA-ER-A19A	41	.	2365	0	Metastatic
TCGA-ER-A19B	2227	2993	.	1	Metastatic
TCGA-ER-A19C	1372	1487	.	1	Metastatic
TCGA-ER-A19D	276	383	.	1	Metastatic
TCGA-ER-A19E	34	396	.	1	Metastatic
TCGA-ER-A19F	464	802	.	1	Metastatic
TCGA-ER-A19G	4708	.	9188	0	Metastatic
TCGA-ER-A19H	3573	4634	.	1	Metastatic
TCGA-ER-A19J	68	196	196	1	Metastatic
TCGA-ER-A19K	30	469	.	1	Primary
TCGA-ER-A19L	3591	4000	.	1	Metastatic
TCGA-ER-A19M	987	1857	.	1	Metastatic
TCGA-ER-A19N	37	1341	.	1	Metastatic
TCGA-ER-A19P	3875	4930	.	1	Metastatic
TCGA-ER-A19Q	1257	1548	.	1	Metastatic
TCGA-ER-A19S	36	.	1505	0	Metastatic
TCGA-ER-A19T	70	270	.	1	Primary
TCGA-ER-A19W	3968	4507	.	1	Metastatic
TCGA-ER-A1A1	47	.	3196	0	Metastatic
TCGA-ER-A2NC	974	1333	.	1	Metastatic
TCGA-ER-A2ND	653	710	.	1	Metastatic
TCGA-ER-A2NE	567	613	.	1	Metastatic
TCGA-ER-A2NF	100	877	498	1	Primary
TCGA-ER-A2NG	567	1490	951	1	Metastatic
TCGA-ER-A2NH	618	.	1264	0	Metastatic
TCGA-ER-A3ES	7239	7514	.	1	Metastatic
TCGA-ER-A3ET	2243	2829	2443	1	Metastatic
TCGA-ER-A3EV	745	1429	1429	1	Metastatic
TCGA-ER-A3PL	958	.	1010	0	Metastatic
TCGA-ER-A42K	35	394	206	1	Metastatic
TCGA-FR-A2OS	15	368	.	1	Primary
TCGA-FR-A3R1	21	.	685	0	Primary
TCGA-FR-A3YN	2285	.	2828	0	Metastatic
TCGA-FR-A44A	2706	.	5299	0	Metastatic
TCGA-FR-A69P	23	.	478	0	Metastatic
TCGA-FR-A726	28	305	263	1	Primary
TCGA-FR-A728	16	.	583	0	Primary
TCGA-FR-A729	6186	.	6716	0	Metastatic
TCGA-FR-A7U8	352	.	847	0	Metastatic
TCGA-FR-A7U9	50	.	571	0	Metastatic
TCGA-FR-A7UA	777	.	1164	0	Metastatic
TCGA-FR-A8YC	992	1059	.	1	Metastatic
TCGA-FR-A8YD	753	1103	896	1	Metastatic
TCGA-FR-A8YE	2788	.	3176	0	Metastatic
TCGA-FS-A1YW	4637	6598	.	1	Metastatic
TCGA-FS-A1YX	1373	1478	.	1	Metastatic
TCGA-FS-A1YY	6736	6953	.	1	Metastatic
TCGA-FS-A1Z0	5440	6164	.	1	Metastatic
TCGA-FS-A1Z3	203	636	.	1	Metastatic
TCGA-FS-A1Z4	382	854	.	1	Metastatic
TCGA-FS-A1Z7	14	237	.	1	Metastatic
TCGA-FS-A1ZA	621	843	.	1	Metastatic
TCGA-FS-A1ZB	1383	1486	.	1	Metastatic
TCGA-FS-A1ZC	10158	10870	.	1	Metastatic
TCGA-FS-A1ZD	1378	1628	.	1	Metastatic
TCGA-FS-A1ZE	631	1413	1225	1	Metastatic
TCGA-FS-A1ZF	369	470	.	1	Metastatic
TCGA-FS-A1ZG	77	295	.	1	Metastatic
TCGA-FS-A1ZH	57	996	.	1	Metastatic
TCGA-FS-A1ZJ	1048	1441	.	1	Metastatic
TCGA-FS-A1ZK	336	728	.	1	Metastatic
TCGA-FS-A1ZM	1639	.	3080	0	Metastatic
TCGA-FS-A1ZN	0	730	.	1	Primary
TCGA-FS-A1ZP	689	2273	.	1	Metastatic
TCGA-FS-A1ZQ	3799	4062	.	1	Metastatic
TCGA-FS-A1ZR	78	347	.	1	Metastatic
TCGA-FS-A1ZS	3031	.	4526	0	Metastatic
TCGA-FS-A1ZT	381	.	1617	0	Metastatic
TCGA-FS-A1ZU	544	808	.	1	Metastatic
TCGA-FS-A1ZW	672	.	1505	0	Metastatic
TCGA-FS-A1ZY	799	824	.	1	Metastatic
TCGA-FS-A1ZZ	659	822	.	1	Metastatic
TCGA-FS-A4F0	734	.	2367	0	Metastatic
TCGA-FS-A4F2	1427	1525	.	1	Metastatic
TCGA-FS-A4F4	1804	2028	.	1	Metastatic
TCGA-FS-A4F5	0	874	.	1	Metastatic
TCGA-FS-A4F8	4886	5318	.	1	Metastatic
TCGA-FS-A4F9	50	.	1035	0	Metastatic
TCGA-FS-A4FB	631	813	.	1	Metastatic
TCGA-FS-A4FC	1309	1655	1504	1	Metastatic
TCGA-FS-A4FD	2300	2454	2369	1	Metastatic
TCGA-FW-A3I3	0	.	531	0	Metastatic
TCGA-FW-A3R5	675	.	1124	0	Metastatic
TCGA-FW-A3TU	1442	1691	1446	1	Metastatic
TCGA-FW-A3TV	5	.	411	0	Metastatic
TCGA-FW-A5DX	41	.	640	0	Primary
TCGA-FW-A5DY	60	.	587	0	Metastatic
TCGA-GF-A2C7	1	.	21	0	Primary
TCGA-GF-A3OT	19	.	301	0	Metastatic
TCGA-GF-A4EO	22	.	591	0	Metastatic
TCGA-GF-A6C8	36	.	62	0	Metastatic
TCGA-GF-A6C9	4	.	480	0	Metastatic
TCGA-GF-A769	1058	1070	.	1	Primary
TCGA-GN-A262	2960	.	4255	0	Metastatic
TCGA-GN-A263	8	467	.	1	Primary
TCGA-GN-A264	2656	3587	.	1	Metastatic
TCGA-GN-A265	62	.	2948	0	Metastatic
TCGA-GN-A266	50	308	.	1	Metastatic
TCGA-GN-A267	1477	1960	.	1	Metastatic
TCGA-GN-A268	1458	1910	.	1	Metastatic
TCGA-GN-A26A	655	988	.	1	Metastatic
TCGA-GN-A26C	95	821	.	1	Primary
TCGA-GN-A26D	757	1460	1204	1	Metastatic
TCGA-GN-A4U3	2230	.	3708	0	Metastatic
TCGA-GN-A4U4	65	.	1197	0	Metastatic
TCGA-GN-A4U5	28	.	1156	0	Primary
TCGA-GN-A4U7	163	317	266	1	Metastatic
TCGA-GN-A4U8	1068	.	1487	0	Metastatic
TCGA-GN-A4U9	60	673	384	1	Metastatic
TCGA-GN-A8LK	1083	1524	.	1	Metastatic
TCGA-GN-A8LL	209	650	.	1	Metastatic
TCGA-GN-A8LN	24	.	772	0	Primary
TCGA-GN-A9SD	1366	1807	.	1	Metastatic
TCGA-HR-A2OH	-20	2004	.	1	Metastatic
TCGA-HR-A5NC	-3	.	1000	0	Primary
TCGA-IH-A3EA	141	.	524	0	Primary
TCGA-LH-A9QB	10847	.	11217	0	Metastatic
TCGA-OD-A75X	8685	9061	8966	1	Metastatic
TCGA-QB-A6FS	27	.	220	0	Metastatic
TCGA-QB-AA9O	25	549	.	1	Metastatic
TCGA-RP-A693	0	.	10	0	Metastatic
TCGA-RP-A694	0	.	21	0	Metastatic
TCGA-W3-A824	1461	.	6940	0	Metastatic
TCGA-W3-A825	1644	1917	.	1	Metastatic
TCGA-W3-AA1O	31	122	.	1	Metastatic
TCGA-W3-AA1R	761	3379	.	1	Metastatic
TCGA-W3-AA1V	946	1280	.	1	Metastatic
TCGA-W3-AA1W	1034	.	6666	0	Metastatic
TCGA-W3-AA21	1035	3195	.	1	Metastatic
TCGA-WE-A8JZ	551	.	731	0	Metastatic
TCGA-WE-A8K1	1006	.	1492	0	Metastatic
TCGA-WE-A8K4	41	.	614	0	Primary
TCGA-WE-A8K5	1457	1860	1654	1	Metastatic
TCGA-WE-A8K6	60	.	546	0	Metastatic
TCGA-WE-A8ZM	2232	.	3082	0	Metastatic
TCGA-WE-A8ZN	1092	.	1794	0	Metastatic
TCGA-WE-A8ZO	1408	.	2145	0	Metastatic
TCGA-WE-A8ZQ	1479	.	1923	0	Metastatic
TCGA-WE-A8ZR	29	274	133	1	Metastatic
TCGA-WE-A8ZT	10	.	359	0	Metastatic
TCGA-WE-A8ZX	26	.	1089	0	Metastatic
TCGA-WE-A8ZY	1230	1506	1330	1	Metastatic
TCGA-WE-AA9Y	34	.	370	0	Metastatic
TCGA-WE-AAA0	311	.	1229	0	Metastatic
TCGA-WE-AAA3	267	.	651	0	Metastatic
TCGA-WE-AAA4	360	.	760	0	Metastatic
TCGA-YD-A9TA	926	.	1496	0	Metastatic
TCGA-YG-AA3N	-3	.	306	0	Primary
TCGA-YG-AA3O	903	1154	1096	1	Metastatic
TCGA-YG-AA3P	294	.	439	0	Metastatic
TCGA-Z2-A8RT	453	.	839	0	Metastatic
TCGA-Z2-AA3S	2611	.	2950	0	Metastatic
TCGA-Z2-AA3V	165	.	486	0	Metastatic
